# Supplementary material for: Highly efficient Ru/CeO2 catalysts for formaldehyde oxidation at low temperature and the mechanistic study
Source: Royal Society of Chemistry journal article supplement (doi:10.1039/d0cy01894e), 2020-12-15
Supplement: d0cy01894e1.pdf [file d0cy01894e1.pdf]

## Supporting Information

### Highly Efficient Ru/CeO<sub>2</sub> Catalyst for Formaldehyde Oxidation at Low Temperature and Mechanistic Study

Xiaoxiao Qin,<sup>a,b</sup> Xueyan Chen,<sup>a,b</sup> Min Chen,<sup>a,b</sup> Jianghao Zhang,<sup>a,b</sup> Hong  
He<sup>a,b,c</sup> and Changbin Zhang\*<sup>a,b</sup>

<sup>a</sup> State Key Joint Laboratory of Environment Simulation and Pollution Control,  
Research Center for Eco-environmental Sciences, Chinese Academy of Sciences,  
Beijing, 100085, China.

<sup>b</sup> University of Chinese Academy of Sciences, Beijing, 100049, China.

<sup>c</sup> Center for Excellence in Regional Atmospheric Environment, Institute of Urban  
Environment, Chinese Academy of Sciences, Xiamen, 361021, China.

\* E-mail: [cbzhang@rcees.ac.cn](mailto:cbzhang@rcees.ac.cn); Tel./Fax: +86-10-62849801

## Experimental

### Catalyst Characterization

The CO pulse experiments were carried out on Chemisorption Analyzer (AutoChem 2920) equipped with a TCD detector to identify real active reaction surface area of Ru/CeO<sub>2</sub> or Ru/Al<sub>2</sub>O<sub>3</sub>. The catalysts were pretreated in the H<sub>2</sub> flow at 300 °C for 1 h. Pulse chemisorption was next carried out at 50 °C. Several pulses of CO were injected at regular intervals, until the area of the recorded peaks became constant. Active reaction surface area (S) was calculated from the amount of adsorbed CO based on the assumption that the stoichiometry factor of chemisorbed CO to surface Ru equals 1:1.<sup>1,2</sup>

$$S = \frac{1}{2} ab N_A M_a$$

Where a and b are the lattice distance of RuO<sub>2</sub> (110), a = 3.12 Å, b = 6.43 Å.<sup>4</sup> N<sub>A</sub> is Avogadro's number, N<sub>A</sub> = 6.02 × 10<sup>23</sup>. M<sub>a</sub> is the adsorbed quantity of CO.

## **List of Table Captions**

**Table S1.** Active reaction surface area of Ru/CeO<sub>2</sub> and Ru/Al<sub>2</sub>O<sub>3</sub> samples

## List of Figure Captions

**Figure S1.** HRTEM images of CeO<sub>2</sub> (a) and Ru/CeO<sub>2</sub>-F (b) and HAADF/STEM images of Ru/CeO<sub>2</sub>-F (c, d, bright field) and Ru/Al<sub>2</sub>O<sub>3</sub>-F (e, f, bright field)

**Figure S2.** In situ DRIFTS over Ru/CeO<sub>2</sub>-F after 1) a flow of He + CO (a) or He + CO<sub>2</sub> (b) for 60 min followed by 2) He purging for 60 min and finally 3) He + O<sub>2</sub> + H<sub>2</sub>O for 30 min at 85 °C. For the dynamic time sequence of the DRIFTS spectra, see the Supporting Information, Figure S6 and S7. Reaction conditions: CO 300 ppm (a) or CO<sub>2</sub> 300 ppm (b), He balance, total flow rate of 100 cm<sup>3</sup> min<sup>-1</sup>

**Figure S3.** Results of stability testing performed at 85 °C under conditions with 300 ppm of CO<sub>2</sub>, 130 ppm of HCHO and GHSV 100000 mL/(g<sub>cat</sub> h)

**Figure S4.** Dynamic changes of in situ DRIFTS for the Ru/CeO<sub>2</sub>-F catalyst as a function of time in a flow of (a) He + HCHO + O<sub>2</sub> + H<sub>2</sub>O, (b) He purging, (c) O<sub>2</sub> purging and (d) He + O<sub>2</sub> + H<sub>2</sub>O at 85 °C. Reaction conditions: HCHO 130 ppm, O<sub>2</sub> 20%, RH 35%, He balance, total flow rate of 100 cm<sup>3</sup> min<sup>-1</sup>

**Figure S5.** Dynamic changes of in situ DRIFTS for the Ru/Al<sub>2</sub>O<sub>3</sub>-F catalyst as a function of time in a flow of (a) He + HCHO + O<sub>2</sub> + H<sub>2</sub>O, (b) He purging, (c) O<sub>2</sub> purging and (d) He + O<sub>2</sub> + H<sub>2</sub>O at 160 °C. Reaction conditions: HCHO 130 ppm, O<sub>2</sub> 20%, RH 35%, He balance, total flow rate of 100 cm<sup>3</sup> min<sup>-1</sup>

**Figure S6.** Dynamic changes of in situ DRIFTS for the Ru/CeO<sub>2</sub>-F catalyst as a function of time in a flow of (a) He + CO, (b) He purging and (c) He + O<sub>2</sub> + H<sub>2</sub>O at 85 °C. Reaction conditions: CO 300 ppm, He balance, total flow rate of 100 cm<sup>3</sup> min<sup>-1</sup>

**Figure S7.** Dynamic changes of in situ DRIFTS for the Ru/CeO<sub>2</sub>-F catalyst as a function of time in a flow of (a) He + CO<sub>2</sub>, (b) He purging and (c) He + O<sub>2</sub> + H<sub>2</sub>O at 85 °C. Reaction conditions: CO<sub>2</sub> 300 ppm, He balance, total flow rate of 100 cm<sup>3</sup> min<sup>-1</sup>

**Table S1.** Active reaction surface area of Ru/CeO<sub>2</sub> and Ru/Al<sub>2</sub>O<sub>3</sub> samples

| Samples                           | Adsorbed quantity (mmol/g) | Reaction surface area (m <sup>2</sup> /g) |
|-----------------------------------|----------------------------|-------------------------------------------|
| Ru/CeO <sub>2</sub>               | 0.020437                   | 1.04*                                     |
| Ru/Al <sub>2</sub> O <sub>3</sub> | 0.006222                   | 0.38                                      |
| CeO <sub>2</sub>                  | 0.003160                   | -                                         |

\* calculated by the difference of CO adsorbed quantities between Ru/CeO<sub>2</sub> and pure CeO<sub>2</sub>.

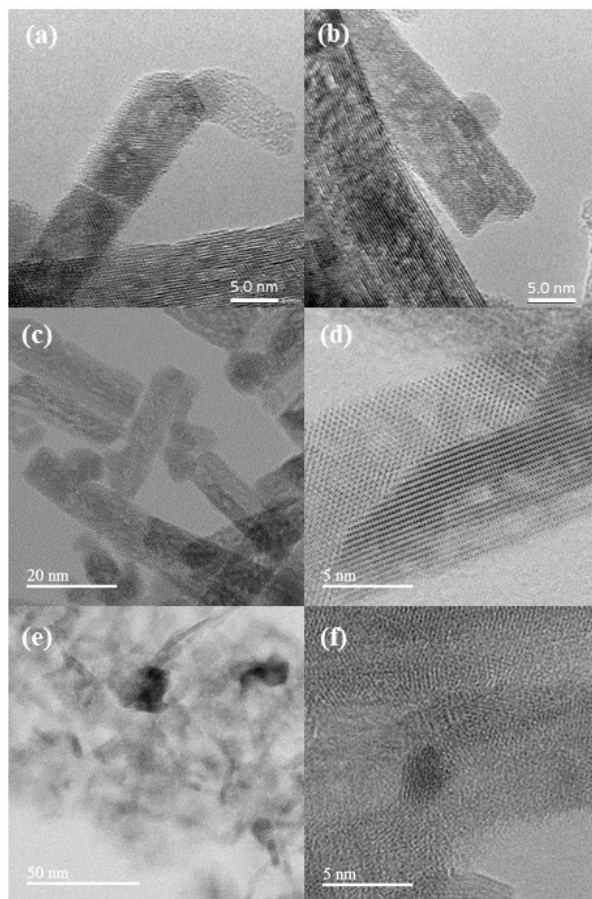

**Figure S1.** HRTEM images of  $\text{CeO}_2$  (a) and  $\text{Ru/CeO}_2\text{-F}$  (b) and HAADF/STEM images of  $\text{Ru/CeO}_2\text{-F}$  (c, d, bright field) and  $\text{Ru/Al}_2\text{O}_3\text{-F}$  (e, f, bright field).

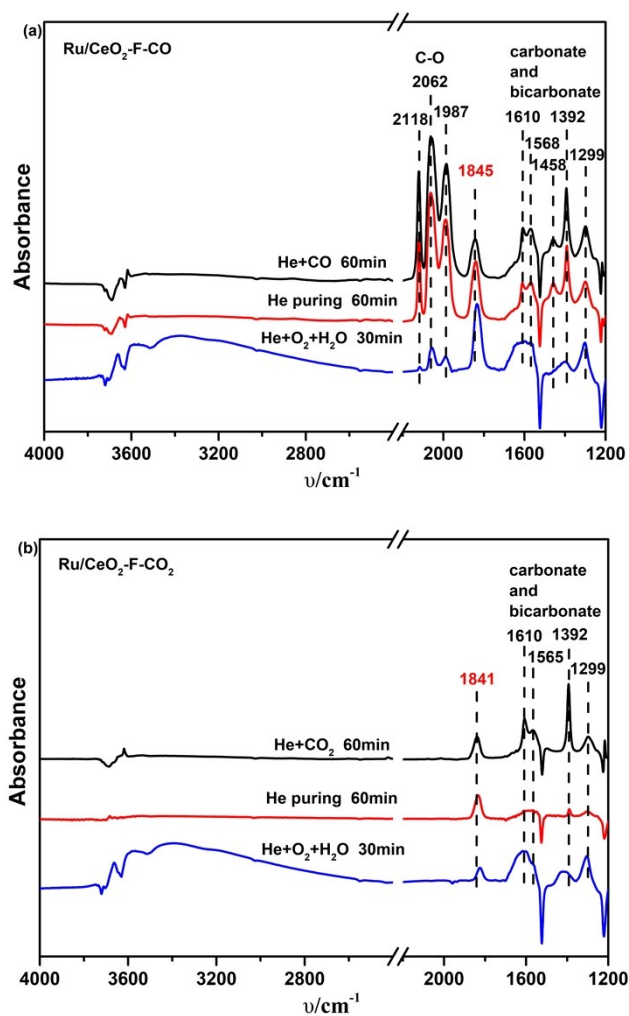

**Figure S2.** In situ DRIFTS over Ru/CeO<sub>2</sub>-F after 1) a flow of He + CO (a) or He + CO<sub>2</sub> (b) for 60 min followed by 2) He purging for 60 min and finally 3) He + O<sub>2</sub> + H<sub>2</sub>O for 30 min at 85 °C. For the dynamic time sequence of the DRIFTS spectra, see the Supporting Information, Figure S6 and S7. Reaction conditions: CO 300 ppm (a) or CO<sub>2</sub> 300 ppm (b), He balance, total flow rate of 100 cm<sup>3</sup> min<sup>-1</sup>.

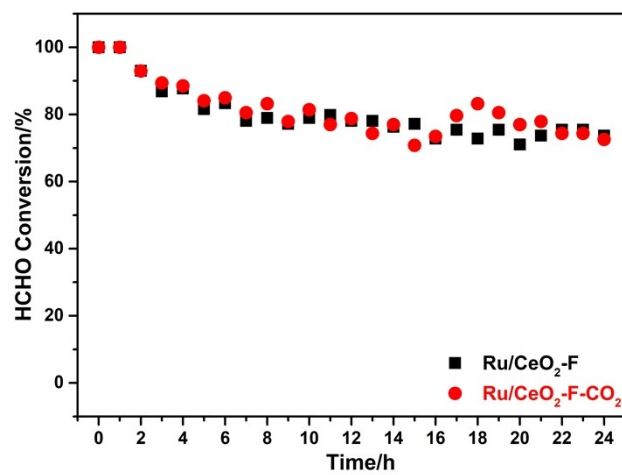

**Figure S3.** Results of stability testing performed at 85 °C under conditions with 300 ppm of CO<sub>2</sub>, 130 ppm of HCHO and GHSV 100000 mL/(g<sub>cat</sub> h).



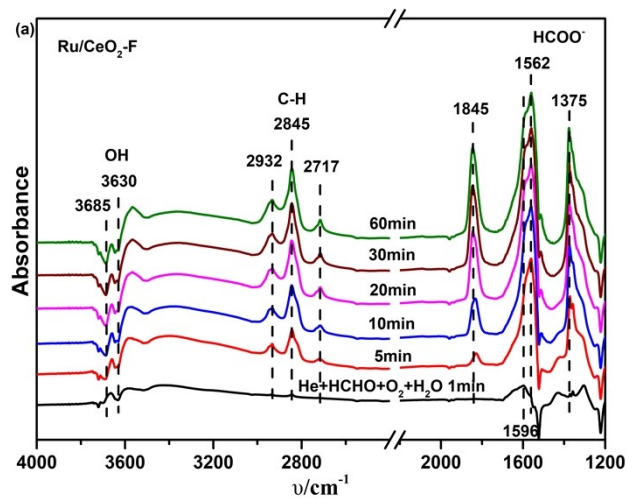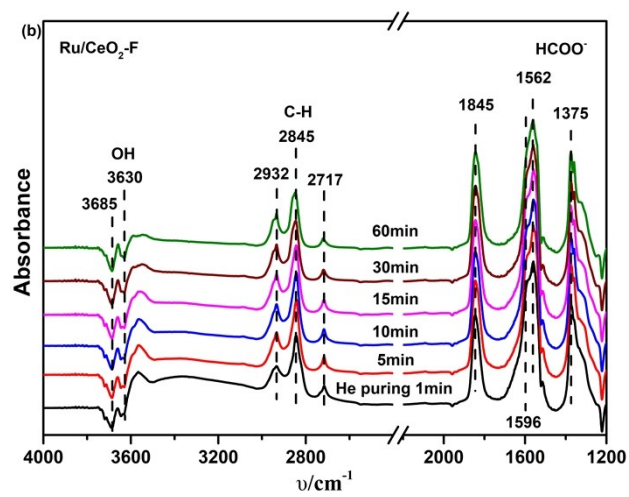

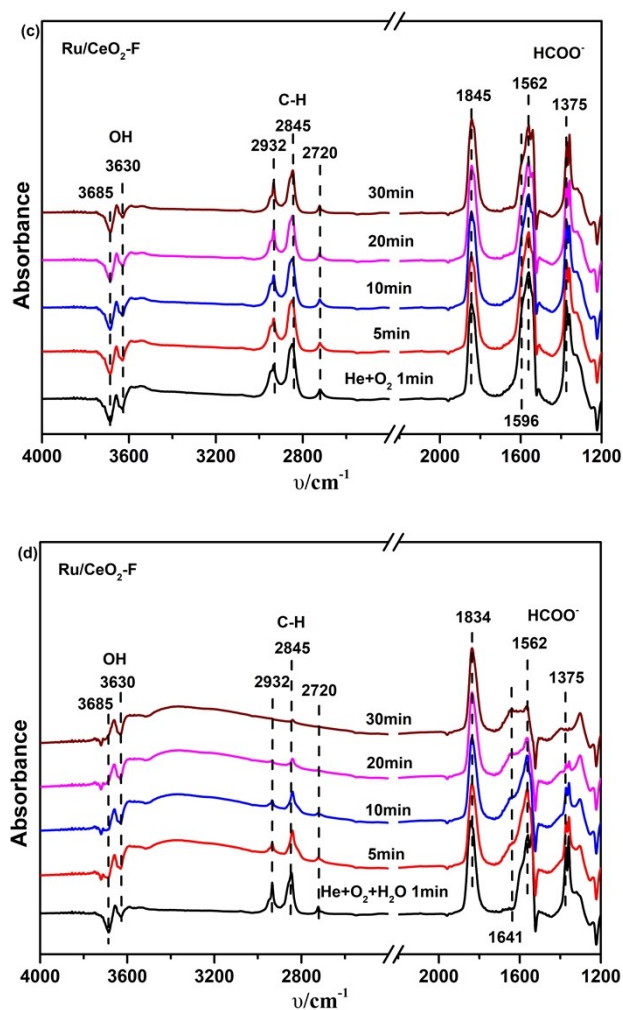

**Figure S4.** Dynamic changes of in situ DRIFTS for the Ru/CeO<sub>2</sub>-F catalyst as a function of time in a flow of (a) He + HCHO + O<sub>2</sub> + H<sub>2</sub>O, (b) He purging, (c) O<sub>2</sub> purging and (d) He + O<sub>2</sub> + H<sub>2</sub>O at 85 °C. Reaction conditions: HCHO 130 ppm, O<sub>2</sub> 20%, RH 35%, He balance, total flow rate of 100 cm<sup>3</sup> min<sup>-1</sup>.

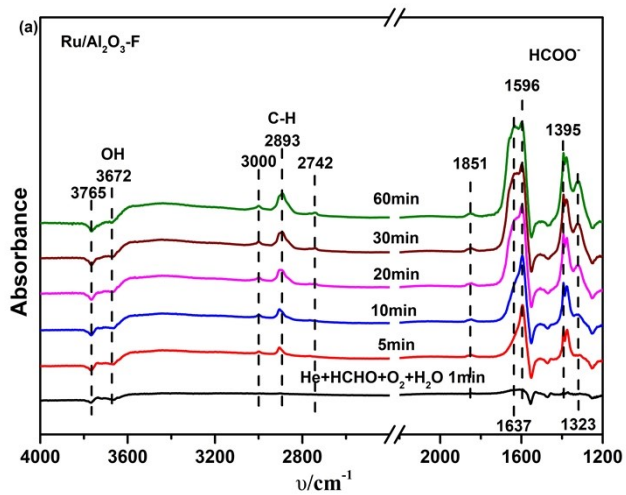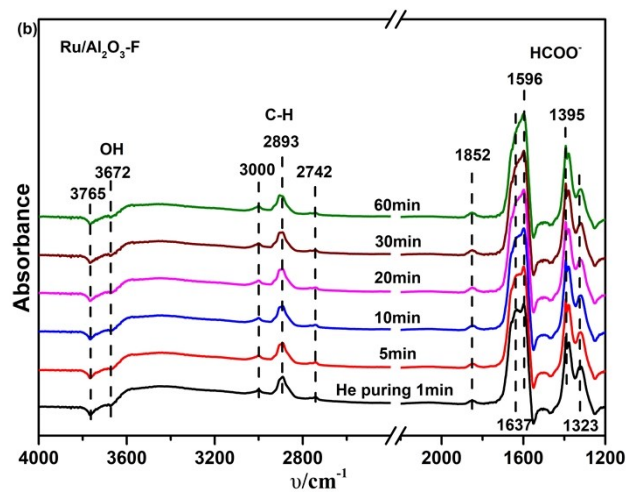

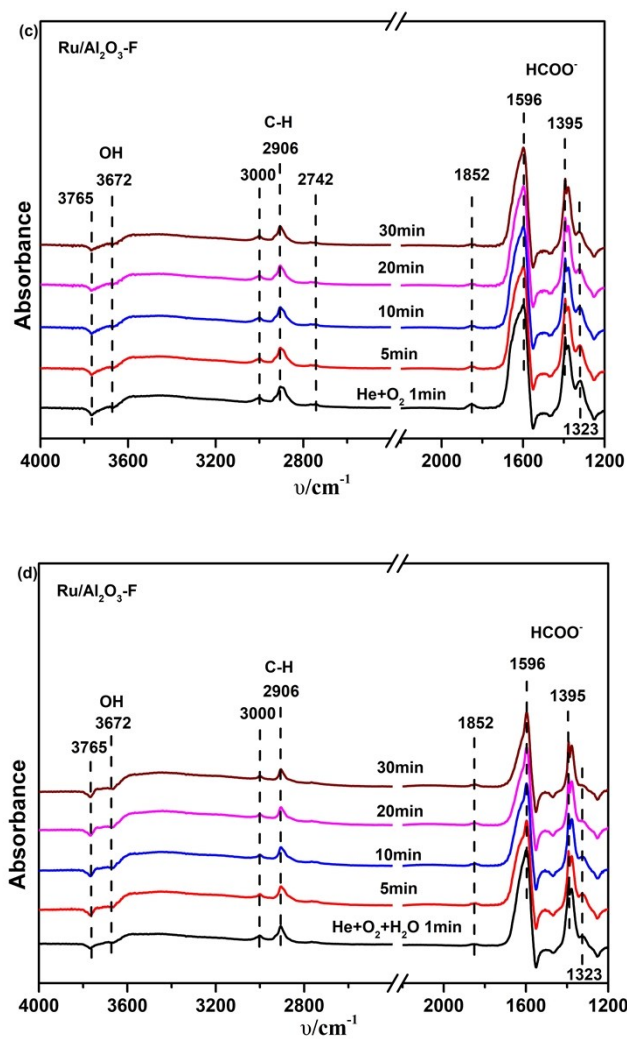

**Figure S5.** Dynamic changes of in situ DRIFTS for the Ru/Al<sub>2</sub>O<sub>3</sub>-F catalyst as a function of time in a flow of (a) He + HCHO + O<sub>2</sub> + H<sub>2</sub>O, (b) He purging, (c) O<sub>2</sub> purging and (d) He + O<sub>2</sub> + H<sub>2</sub>O at 160 °C. Reaction conditions: HCHO 130 ppm, O<sub>2</sub> 20%, RH 35%, He balance, total flow rate of 100 cm<sup>3</sup> min<sup>-1</sup>.

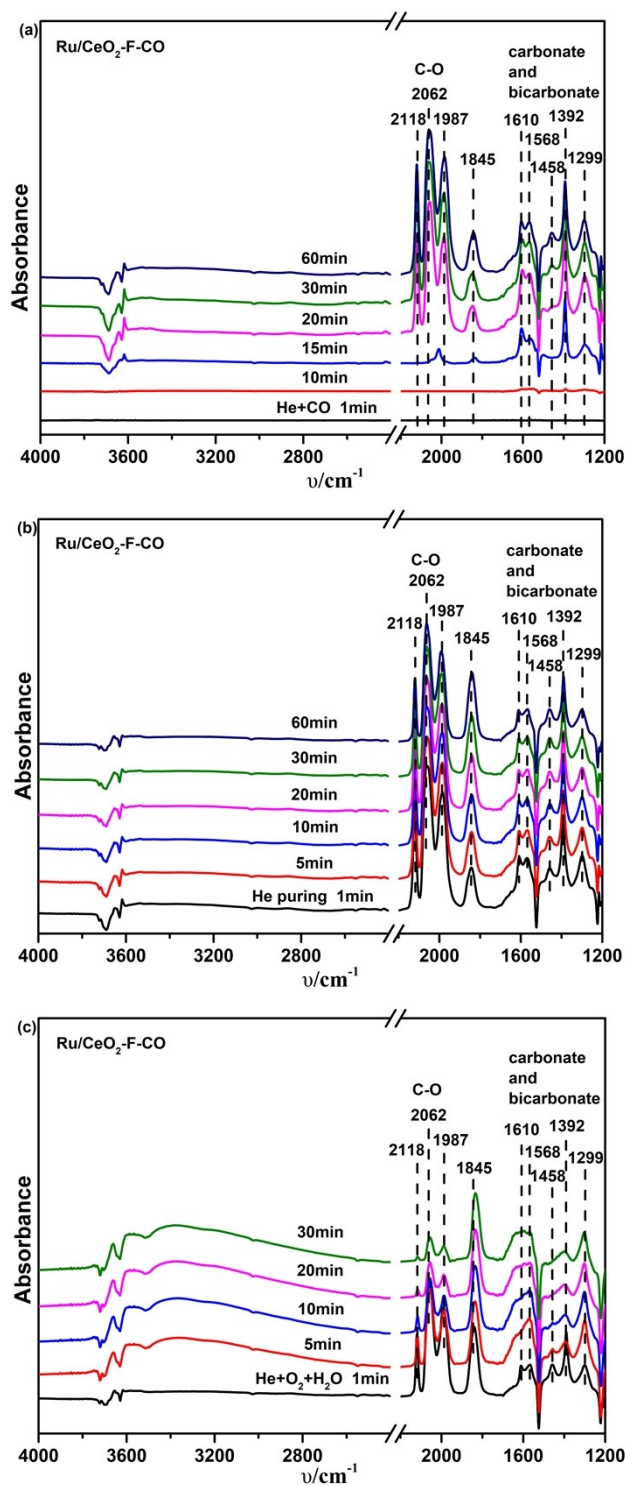

**Figure S6.** Dynamic changes of in situ DRIFTS for the Ru/CeO<sub>2</sub>-F catalyst as a function of time in a flow of (a) He + CO, (b) He purging and (c) He + O<sub>2</sub> + H<sub>2</sub>O at 85 °C. Reaction conditions: CO 300 ppm, He balance, total flow rate of 100 cm<sup>3</sup> min<sup>-1</sup>.

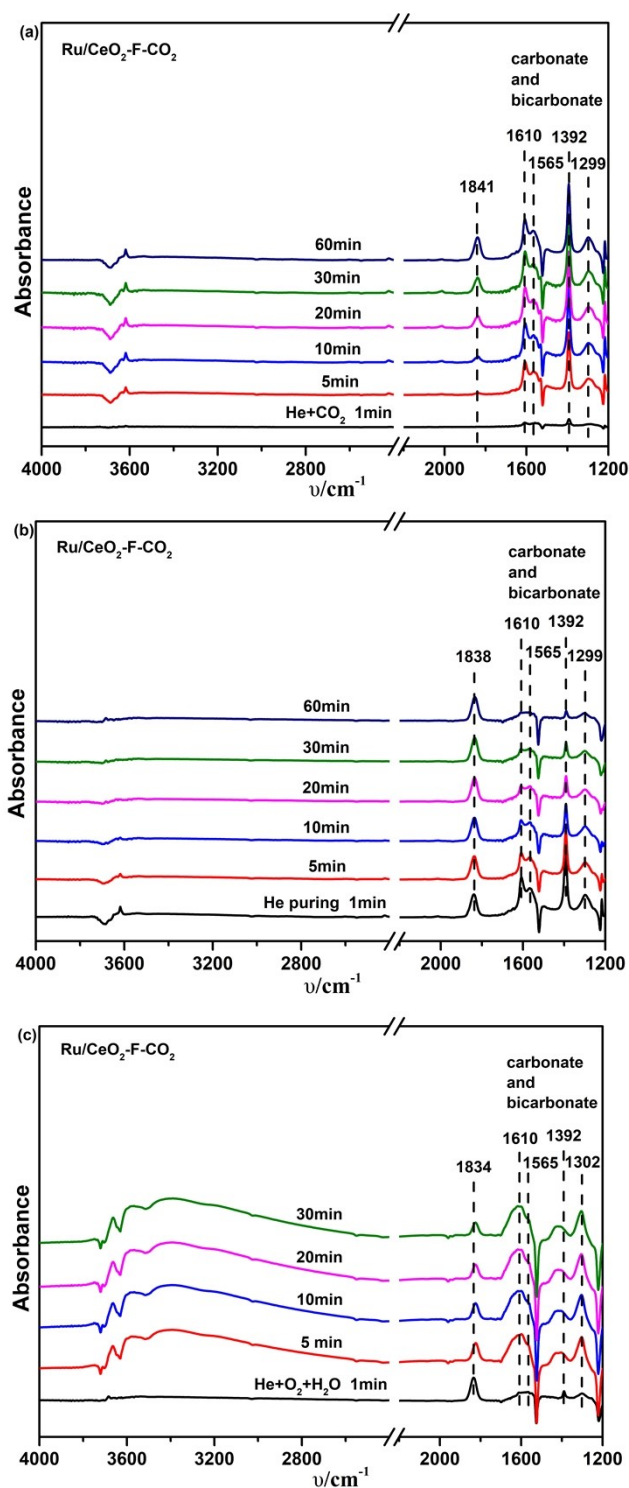

**Figure S7.** Dynamic changes of in situ DRIFTS for the Ru/CeO<sub>2</sub>-F catalyst as a function of time in a flow of (a) He + CO<sub>2</sub>, (b) He purging and (c) He + O<sub>2</sub> + H<sub>2</sub>O at 85 °C. Reaction conditions: CO<sub>2</sub> 300 ppm, He balance, total flow rate of 100 cm<sup>3</sup> min<sup>-1</sup>.

## Reference

1. L. Chen, Y. Zhu, H. Zheng, C. Zhang and Y. Li, *Applied Catalysis A: General*, 2012, **411-412**, 95-104.
2. C. Newman, X. Zhou, B. Goundie, I. T. Ghampson, R. A. Pollock, Z. Ross, M. C. Wheeler, R. W. Meulenberg, R. N. Austin and B. G. Frederick, *Applied Catalysis A: General*, 2014, **477**, 64-74.
3. L. Torrente-Murciano, *J Nanopart Res*, 2016, **18**, 87.
4. K. Reuter and M. Scheffler, *Physical Review B*, 2006, **73**.
